# Supplementary material for: Surveillance of panicle positions by unmanned aerial vehicle to reveal morphological features of rice
Source: PLoS One. 2019 Oct 31;14(10):e0224386. doi: 10.1371/journal.pone.0224386 (PMC6822732; doi:10.1371/journal.pone.0224386)
Supplement: S1 File — (XLSX) [file pone.0224386.s009.xlsx]

## Sheet: Sheet1
S1 File. Positions and primer sequences of DNA insertion-deletion (indel) markers used for QTL analysis in HOMI-RILs.
Name	Chr	Position of forward primer	Position of reverse primer	Forward primer	Reverse primer
Indel_10	1	3226280	3226680	TGGACCTTGGTAGATGCTGAC	CACTAGATCTGCGACGGTTG
Indel_13	1	4738372	4738772	CCAAATCCAATTTCTCTCTGGA	AAATATCCACACATCCACCACA
Indel_14	1	5722673	5723073	ACTGTCTGCCAGGCAAATAAAT	AACCAGTTGCCTGTCCTTTCT
Indel_26	1	9074563	9074963	GTCGCTCTCTCTCTCTCGCTCT	TGGAGTGATGGGTGCACAG
Indel_30	1	10897784	10898184	CGACCAAACACGCTAACTAGAA	GAGAGAATCGTGTCCTCTGCTC
Indel_38	1	15052144	15052544	GGTGGAGAGGAGGAGCGTATAG	GTAGTACGGCCCTTAAAGTTGG
Indel_40	1	17103557	17103957	AAGGATCAATTGGATTTGCTTG	AAGAATAAGTTAGTTCCCAGTTCC
Indel_44	1	19265408	19265808	CACCCAATTCAAATAGGTTACCA	CGAGTCTTGGCTAATCCTCTCA
Indel_47	1	20626839	20627239	TCTTTGGATTGGAAGAGGAGTC	GGCAATGAACTCTCACCCTTAG
Indel_51	1	23113659	23114059	GATCAAGAGCCTATTCGTCGTC	TTGATGAAGAGCTTGGTGAACT
Indel_54	1	25426792	25427192	TGTGTAGAACAAGACAACCAATGA	GAGTTGGTAATGGTGAGTGGTG
Indel_58	1	28174829	28175229	CCTTAACAATCTGTTCGGGTTT	TTTAACAGCTAGGAAGATCCATGA
Indel_63	1	30697969	30698369	ATTGCCCGAGGTAGAATATGTG	GAATGGCCTTACATGGCAGT
Indel_65	1	31492754	31493154	GCTGTTCCCGTTCTGAATTT	TTGCACAACGGAATACGATTAG
Indel_68	1	33275665	33276065	ATCCATGGAGTTCAATCCAGTC	GGTTTAGATCTTTGTGGGTGGA
Indel_70	1	35011137	35011537	CGGTCGTCACAGTAGCTGTCT	TTGCTAGTGCTAACACAACTCG
Indel_74	1	36757188	36757588	CTCTGGTGCGTTGCTAACCTA	ATCTCACCGTGCCATCAGATT
Indel_77	1	38562502	38562902	TGAAACCTACTGTCCCATCTCC	TCCTCTCGTATGAACCCTGTTT
Indel_81	1	40737404	40737804	CAAAGAAGAACAGCAGCCAAG	CATGCACATGGTCCAAATTAAG
Indel_84	1	43238487	43238887	AACAAATGACAACGAATCCAGA	TATTGGACGATGCACCAGAAG
Indel_86	2	103800	104200	CTCAATGCATTTCCTCCATTCT	TCCAATACTGTTAGGGTGAGCA
Indel_92	2	2369742	2370142	GCAACCGGTGGTCTATCTCTAA	AAAGATTGATTGGATTGCCCTA
Indel_100	2	5314253	5314653	TTGCTCAATGTTTAGCTTCTTGA	TAAACTGCCAAGAAAGACAGCA
Indel_112	2	9985637	9986037	AGAGGAGATGAGGAGGAGGAAC	TGCATCACAGAACCTTATCCTG
Indel_120	2	12685117	12685517	ATCTGTCATCATACCGTGATGG	ATATCATCATCATGCGGTTGTG
Indel_124	2	14678397	14678797	TAGCCAGATTGGAAAGCTCATC	CGAGTGCTTAGACACGGTATTC
Indel_131	2	16981183	16981583	CGACAACAGCTGAATGAGTGAT	TCATGATGACGAGCTGAAACTT
Indel_133	2	18587840	18588240	ACCCGATATCACCCAACATTTA	CATCCATCCTCTCCATGTTCTT
Indel_136	2	21350373	21350773	CGGTCGACAATTTAATCTTGCT	AGCCTTGTGGTCGTACTATTGG
Indel_139	2	23772330	23772730	TGCAAACTCTACTTGCTCAGGA	CGCTACTTGGGTTCTTCCTAAA
Indel_140	2	26244197	26244597	CGTTATCTGTTTACTAATCTGCAA	GCATCTTTAGGCATTGTATGGA
Indel_141	2	28649397	28649797	CCTGTCTGTACATGGAATCTGG	GTGGTAGCCTGCCTGTTCTTAT
Indel_749	2	30929663	30930063	TCTTCTCCACGTATGCAATCTG	GGGAGAATTTGTACCGTTTGAA
Indel_153	3	1851256	1851656	TAGAGGAACAGAGCAAGTGTGG	CAACCTGTAAGCAGAGCATACG
Indel_155	3	4248487	4248887	CACACGCATCCACAGCTC	GGTTGGGCACGAAGAACAC
Indel_162	3	7831645	7832045	TCTTGTGGTAACCTACGTGCAG	TGCCAGCAGCTATCTAACTGAG
Indel_165	3	9315744	9316144	ATGCTGGTCTGGTCCTTCAC	GGTTGTTGGTGGTTTGTTGGT
Indel_169	3	10811188	10811588	GGCTCTCGTAGCAACTAACAAA	AATCCTAATTAACGAAACAAAGTG
Indel_171	3	11622419	11622819	TAAATGCAGGCATGCTTGTGAC	TGTTTCCTGAAAGCATCATGTC
Indel_174	3	13176067	13176467	TGGAAGAAATCAGCATCATCAC	CGCTGGTCTGGTGTATTCATT
Indel_752	3	14540882	14541282	TGTCCTCCTCACCCTTGTAATC	CTTTGGAGAATGGGTTGGTG
Indel_762	3	25315363	25315763	GTCGTCCTCAGCTCTCATCTG	GCTAGCACGCACAGTGAAGTAG
Indel_204	3	28148810	28149210	CTTCTTCCGGTGGAGGTTT	TACTCGAGCGACAGGTAGTTGA
Indel_206	3	29214332	29214732	TGCACCATTTATTGGGTATCTG	GTGAAAGCGGTCTTCCATCTAA
Indel_224	4	87646	88046	CACTCCAATCCAACTAGGGTTC	CATGAATCCGGTATGTGATCC
Indel_225	4	2061299	2061699	GGAAGAAGAAGTTGACAACATGG	CGCTTCCTACGTACGCTTAAAT
Indel_229	4	4412906	4413306	GGCTAGTTTCTGAAATTCACATTG	AGTTTAAAGGGACACCCACAAA
Indel_231	4	6060968	6061368	GATCGTTGGTCTTCCCTTCTTA	CACGTCTTGTTGTTACCGTCAT
Indel_235	4	8771827	8772227	AATCACCCGTAAGTGGCTTAAC	CTTTGGTACAGCTGGTTCAGTG
Indel_236	4	10067435	10067835	GACGACGAGAAAGATGAGCTG	GGTGTACAACCTAGTGCAACGA
Indel_238	4	12726450	12726850	CGTGGCTTGTTAAAGACGTACA	ATCAATAGTGACGGGTCTGGTT
Indel_242	4	16205691	16206091	AAACGGTCAAGAGAAATTCGAG	AAATGATGAGTCATATGTGACAGG
Indel_249	4	18593981	18594381	TGGATTCTCTCTCCTCCACAAC	GAGCAAGCAGAGCAAGTGTTAG
Indel_780	4	20377762	20378162	CCCACACATATCAATAAGAAACCA	GCAGTCATTGTATCGATGTTTGT
Indel_260	4	23300526	23300926	AGCCGTGGCTTATAATAGCTGA	GGTGTGGTCATATGCGTGAA
Indel_265	4	25382199	25382599	GCCGTGTGATGATTAGAGTTCA	CGATATGATATTATTTCAGCCAAA
Indel_268	4	27138329	27138729	CGTGAGGTTCAAGGTTCTGAAG	CTTTGTAAAGCACCTTCTTTCG
Indel_271	4	30473436	30473836	CATTCAGACCGAAACACTCAAA	GCGTGAAATGTACCGAATCAAT
Indel_779	4	31616242	31616642	ACTGCAAATGTTTCGGTTTCTT	GGAGGAGGTGATTGTCAAAGTC
Indel_276	4	33388276	33388676	CCGGATTGAACTGTCCATGTTA	CAGCAAAGAAACCCTTCACAAT
Indel_279	5	34562	34962	CCATGGCTGAAATCGAAACTAT	CTTGACTTCTGTTGCAGCTACG
Indel_283	5	1242482	1242882	TTCATGCTTAGTGTACTGTTTGC	TGTCTTGAAGATCAACAGACTAAC
Indel_286	5	3147530	3147930	AAGCAAGTCTGCAAGTGCTATG	AAACTCTGTTGTTGGGCAGACT
Indel_289	5	4591288	4591688	GTTAATGAGAGCTGTCCGGTTT	ACATGTTGCTCCAGAGTCAGAA
Indel_294	5	6015893	6016293	AACTACTTCACCGCGTCGAT	TTGCTATTGCTTGCTTTGACAT
Indel_296	5	6613866	6614266	GGGCCTACCCGCTTGAAA	AAACTGTACTCTTGCGGAAA
Indel_298	5	7758814	7759214	GCTGTTGTTGTTGCCATGTTAC	AGAATAATTAGCGGCAGCCATA
Indel_300	5	8018443	8018843	GCCGATTTAACCGTGAAGATAC	ACTTGGAGAATGGGACAAAGAA
Indel_304	5	13735761	13736161	AAACTCATGCCCTTCTGGTTT	GCTCTGCAGAATGATAGGTCAG
Indel_308	5	16380021	16380421	ACGACAGAAACTTCTTGCAAAT	CACGATGAACGTGTGTGTAT
Indel_309	5	17281258	17281658	TATTGACCTTTCTAGCCCAAGG	TCTCAACTATATGGTCGCGATG
Indel_315	5	19139848	19140248	GTTGTTCGCTTCTCGCTAGAGT	CGCTACTTTCGCATTCTCTCTC
Indel_318	5	20461775	20462175	ACTCGGTTTAGGGAACCTCTTC	TTCCAAGATCCACAATGAAACA
Indel_322	5	22590202	22590602	TTGGTCCAACATGTTTCCATTA	GGATGACCCACATCATCATCTA
Indel_324	5	23702292	23702692	AGTTCTGGTCAATTAAATGTTACG	TTTAGGCTGGAAACTTAAGAACA
Indel_328	5	25607031	25607431	AACCGAAATCCGTGACATTAGT	TTTAAACGGGCCCTTATTCTC
Indel_333	5	28151851	28152251	ATCAGAGACAGTTCGGTTTGGT	TAGCTAGCCAAGTACGATCAGC
Indel_342	6	844913	845313	CACTAGTTCCAAGTATCGAACAAA	GCATGTACGTCAGGAGCATTT
Indel_345	6	1677939	1678339	AATAATAGGGATGTGGGATTCG	AGGTTCAAATCTCCAGTCGTGT
Indel_346	6	2659364	2659764	GGTTCTTATGAAGCAAGCAGGT	GACGACAGTCTATTGTTTGTCTCA
Indel_351	6	5160201	5160601	TGTTCTTAGCCACGAAATAGGTG	CTAATCCTCCACCGAAACTGG
Indel_357	6	8433275	8433675	CGATTCGCGAGTTCGTAGTT	ACGTGGTGTCTACGAAGCATTA
Indel_803	6	9827654	9828054	GCGATTAGATTCTCACGAGGAC	GTTCCGATCTGTAGCATCTTGG
Indel_363	6	11873601	11874001	CCAGTTTGACATCAGGTTTGAA	AAAGCTAGCCACACAGGTGATT
Indel_366	6	13917268	13917668	TTGTACTCCCTCCTCCCATAAA	CGCTACGGTTACAACTTACTCC
Indel_367	6	15134537	15134937	TGCAACCATGTGTAAGATGAGTC	TTCTTGCGTGAACCTGGAC
Indel_370	6	16093117	16093517	GATTTATGGTGCATATGAACTTCG	GCACTTCCAAATATCCAGTTCC
Indel_372	6	18215901	18216301	ACTAGTCCACCTCCCACGAG	CCAGGGTTATCACCCATTACAA
Indel_376	6	20068664	20069064	AAATAGCGGATAACCTTGCGTA	TTTCCAAGTACACCACAACAATG
Indel_386	6	24454799	24455199	ATCTCAAGCAACAGCTCCTCTC	TGTGTGTGTGTGAAGGTCTGAA
Indel_805	6	25962232	25962632	CTTCTTCCGCCTCCCTTC	GTGAACATGTGGGAGTTGTGG
Indel_392	6	28043845	28044245	AGTTAAGCTTCCGCACAGTGTT	GGTGTGAGATCAGTTGAGATGC
Indel_395	6	29584796	29585196	TGGCCAAATCAATTATTGTACG	CCCAATTTCGTACTCCTCTTTG
Indel_396	6	31170431	31170831	TGCAATTAATATATCCCACGCTTA	CTGTAAGTTTCTCAGCCCATCC
Indel_401	7	812246	812646	GCATGTAGGGATCAGACCAGTT	TTCATAGTTGTCGGAAGTTGTCA
Indel_405	7	1764324	1764724	TTCAATTCCTCCCAATCTAACG	TTGCAGTAGTGGACATGCTACC
Indel_414	7	6358539	6358939	CACTCGGTCTCCTCATCTCTCT	GTACAACCAGCCAACCAGATTT
Indel_437	7	18764981	18765381	GTCATTTGGTTGATTGTTGACC	ATCGACATACATGGTCACGGTA
Indel_439	7	20050092	20050492	GCCTAGGCAAGGCAGGTC	GGCGTCCTGCAGGTAAGAT
Indel_444	7	21893288	21893688	CATTTGGTCCAAGAAATTGAAA	GTTGCGGCTACGTCACTAAGTT
Indel_445	7	23127954	23128354	AATATATCGCATTTGGTCTACAG	AGCTACTTGGTAGCAGGACTGG
Indel_455	7	27788281	27788681	ATGACGCATTAGGGAGAAGAAA	TAGAAGCTTGGAATGGAAGACC
Indel_456	7	29583383	29583783	TCCATCTGACAAGTTTGTGTATCA	ATTCACGACAATTGGACTGAGC
Indel_458	8	34311	34711	AAATAACCCATCGCGTAGGAA	GAGCCATCGTCCAAATTAAACT
Indel_460	8	1292280	1292680	AGCGGAGATGGTTCAGAAATAG	AGCAAGTCTCTGTCGCTTTCTT
Indel_464	8	2411848	2412248	CACGAAACTTTACCCAAACTGC	GATATGTTAAATTGGGACGTTCG
Indel_826	8	3553501	3553901	TTATCAAATTGCCGATCGTATG	AACCCAAGCGAAGCGAAG
Indel_830	8	4063087	4063487	TGGGAGTACACCATTCATTGAG	TTTATTGACCCATTGACATCCA
Indel_482	8	18721123	18721523	ATGAATTTGCCCTGCTCTATGT	TGTCACACTGGAATCTGTCCAT
Indel_498	8	24351593	24351993	CCGTCATCGTTACTACACATCC	TAATTATGCCTGGATCATCTGG
Indel_501	8	25461892	25462292	GAATGGTAGGATAGCGGATGAG	CAGAACTATCAGCGATCTCAGG
Indel_507	8	27134386	27134786	CTCTGTCCTTGCTTCCCTCCT	AAGAGAGGGCATACCTTGAAGC
Indel_510	8	28320548	28320948	TTTCTAGCACAGTAAATCTAACCA	TACGTGCATGTACTCCCTCACT
Indel_512	9	144001	144401	ATGATCATCACCACTTTCCACA	CTAACAGCCGGAGGTCTATGTT
Indel_514	9	2547955	2548355	GATGGTTGAGAGAGACGTGAGA	ACCATTGTTGCATTGTAGACCA
Indel_517	9	4076423	4076823	ACGTGAACATGGTAGCAATGG	CAAGAGCTACCACATCATTGACA
Indel_520	9	5395726	5396126	GGGTAGCCAGCGTAGGAG	GGTGTCCACCACCACCAC
Indel_521	9	6036692	6037092	TTCGTTGTACTAACAAGTGTCCAA	TCCACTTTGAGGTCACCCTAAC
Indel_523	9	7742883	7743283	TAACGGCTTTGAAGACGAGATT	AGAAGGAGAACGCTGGACAAC
Indel_525	9	9004175	9004575	CCAATTCTTAAACCTGCTGAGA	CTGTGGAACTCTCCACTGCTC
Indel_529	9	10745038	10745438	TCCATTCCTATATGTTTGGACGTA	ACATATTGGCTAAAGTTGACAAA
Indel_532	9	12089666	12090066	GGATCATTGGTGCAGTTTGAG	GAGGAAGAAGAAGAGCGGAAG
Indel_537	9	14163472	14163872	TATCGAAGTAATGGCGAGTCGT	AGCCATTTCCATGTGTAGGAGT
Indel_539	9	15627278	15627678	GCTTACAGCTTTGCTGCTTACC	GGTTGTTGCACTGCTCATGTAT
Indel_540	9	16417766	16418166	TCATGGTGGATTCGTTCAATAG	CTACGCACTGTGCTAATTCTGG
Indel_541	9	18021466	18021866	GCCATTTGTGAAACAATGACAG	CTGGCACTTGTGGAAACAGTAG
Indel_544	9	20466801	20467201	GGTTAAACACTTGTGTCGCCTTA	AGCCCGGCTTAACAACAGA
Indel_547	9	22906640	22907040	AATTACCAGCTCCTCCTCTTGA	TACGCCCTTCCAGTTGATCTAT
Indel_551	10	2342294	2342694	CAACGGCTCGGAATAAATCTT	TGCACATTTAACATTGAAGCAA
Indel_555	10	4666402	4666802	CACGTCACATTTCGCAAGAC	CTTCCTCTTCACCGGTACGC
Indel_558	10	5216562	5216962	CGACCAACCAACAGTGTCATT	ATCAGATGTGTCTCGATGTTGG
Indel_559	10	6992545	6992945	GGTGAATAGGATTGTGAACTACCA	CACTGCATAGTCCTGTCCTGAA
Indel_562	10	7450350	7450750	TTCTGTTTGTGCAAATTTAAGC	CTCCAAATTGCCATGGATAAA
Indel_565	10	9236406	9236806	ATGCCACCTTCCACAGCTTAG	CCTTGATGTCCAGCTCCAAT
Indel_578	10	14636744	14637144	TGTTTGGGAAAGAGGGAGTATT	ATATGAATTGGGACCCACCTTG
Indel_584	10	16863086	16863486	GAAGACCAAGAACCAGAAGACG	GCCGACGAGGTCAATGAAG
Indel_586	10	17304728	17305128	GCCACGGTAAATCGAAACTTTA	AACGGGCGTGATCTAGATGTAT
Indel_590	10	19540676	19541076	TATAGGACAACGAATCCGTCCA	CAGAATTCCAATTTCAGAATGGT
Indel_592	10	21058597	21058997	CAAGTGTCCTAGACCGCAAAC	CGCCGTGATCGGTACGAA
Indel_596	10	22501555	22501955	GCATCTCATTCTCATCCCTGT	ATAGTTGTTGCACATGCGATCC
Indel_599	11	632605	633005	AATCTAGGACAGTAAATCAGAAGC	TCACCTTTCTGAACTTGAACGA
Indel_601	11	2069893	2070293	TCTTGTTTCGTGCTGTCTTTGT	TGCAACTGCAAGAAGATCCATA
Indel_604	11	3246322	3246722	TATGAATCCCAAACGGTGTACG	CGGCTTAGCATTCGTTCTCTT
Indel_608	11	5430508	5430908	CCCTATAAGCAATTACTGCATGTT	CCCGTAACTTATTTGGTGCTTT
Indel_609	11	6296886	6297286	ATCTTCTTCTTGCATCGAAAGC	GGTGTAATCTGTCTGGCAATCA
Indel_611	11	7618047	7618447	CTGCGAGTTCCTCGTCATC	GCACGAGTCCACGGAATAAT
Indel_619	11	11788967	11789367	AAATGGAGAAGGCCAAAGAAAC	CTAATCTCACCAAACCACACCA
Indel_622	11	12635478	12635878	CCCATATCATGTACATATCAATCC	ATTTGATGGCATTTCCACTTTC
Indel_623	11	14692785	14693185	CAGCTTAGGTGCTGTTGGAAAC	GCTCACATGTCAGTGGCATAAC
Indel_628	11	16896180	16896580	TTGTAAGCCAAGAGCAGTTCAA	AAAGGGTAGCTTGAGCAATGAA
Indel_631	11	18958950	18959350	TGAAGGTCTACCTGTCATCTTT	GGTTAGGTTGTAGTTGGTGCAA
Indel_634	11	19875270	19875670	CACCGCTGCCTCCCTCTC	AGTCGTGCTGCTTCGAGAC
Indel_636	11	21250225	21250625	ACGTGTGTGTTATCCAAGTTGC	CAGCTTGAATGTCTGTGGATCT
Indel_641	11	23413879	23414279	GGCAGGAGGTGGAGAAGG	AGACACTTGAAGGCCCAATATC
Indel_648	11	25579597	25579997	ACGCGAGGAGAGAGAGAAGTAA	GAATCGACTCCTTTGGTGGT
Indel_652	11	26524241	26524641	ATCCAAACCAAATTGCCAAAC	CTCGTTTGGCTGGTGTGTAGTA
Indel_660	11	28932339	28932739	CTTGATCTGTGTTCGTCCAAAT	GAATCGGTGGAAGAGGTGAC
Indel_674	12	4958666	4959066	ATCACTTGCTTCGGATATTGGT	CGATATTATGGAGATCCAATCCA
Indel_676	12	5474919	5475319	AAATCCGACGTGGCACTG	CGAAGAGAGGGAAAGAAATTGA
Indel_678	12	6935812	6936212	TTTGTGTTCGTCCTTTCTGATCT	TTGGCACTTATTTAATGAGCTGTA
Indel_720	12	23685593	23685993	GAGGACGAGATGAGACGAAGAG	CTAGCTCCATCCATCCATCGT
Indel_724	12	25699615	25700015	GCTAGCCAAGAACAATAAGCAA	CGAACGGGAGCACGATATT
Indel_726	12	27517193	27517593	AGCCACACATACAGCCACATAA	AAGAGGAATTGGAATTGGACCT
